# Supplementary material for: Enhanced Efficiency and Stability of Sky Blue Perovskite Light-Emitting Diodes via Introducing Lead Acetate
Source: MDPI journal article supplement (doi:10.3390/molecules29112425), 2024-05-21
Supplement: s1 [file s1]

# Enhanced Efficiency and Stability of Sky Blue Perovskite Light-Emitting Diodes via Introducing Lead Acetate

Zequan Zhang <sup>1</sup>, Qiaoli Niu <sup>1,\*</sup>, Baoxiang Chai <sup>1</sup>, Junhao Xiong <sup>1</sup>, Yuqing Chen <sup>1</sup>,  
Wenjin Zeng <sup>1</sup>, Xinwen Peng <sup>2</sup>, Emmanuel Iheanyichukwu Iwuoha <sup>3</sup> and Ruidong Xia <sup>1,\*</sup>

<sup>1</sup> State Key Laboratory of Organic Electronics and Information Displays & Institute of Advanced Materials (IAM), Nanjing University of Posts & Telecommunications, 9 Wenyuan Road, Nanjing 210023, China; zzq15235813322@163.com (Z.Z.); 18300633693@163.com (B.C.); 18790401377@163.com (J.X.); 1023061507@njupt.edu.cn (Y.C.); iamwjzeng@njupt.edu.cn (W.Z.)

<sup>2</sup> State Key Laboratory of Pulp and Paper Engineering, School of Light Industry and Engineering, South China University of Technology, Guangzhou 510640, China; fexwpeng@scut.edu.cn

<sup>3</sup> Sensor Lab (University of the Western Cape Sensor Laboratories), 4th Floor Chemical Sciences Building, University of the Western Cape, Robert Sobukwe Road, Bellville, Cape Town 7535, South Africa; eiwuoha@uwc.ac.za

\* Correspondence: iamqlniu@njupt.edu.cn (Q.N.); iamrdxia@njupt.edu.cn (R.X)

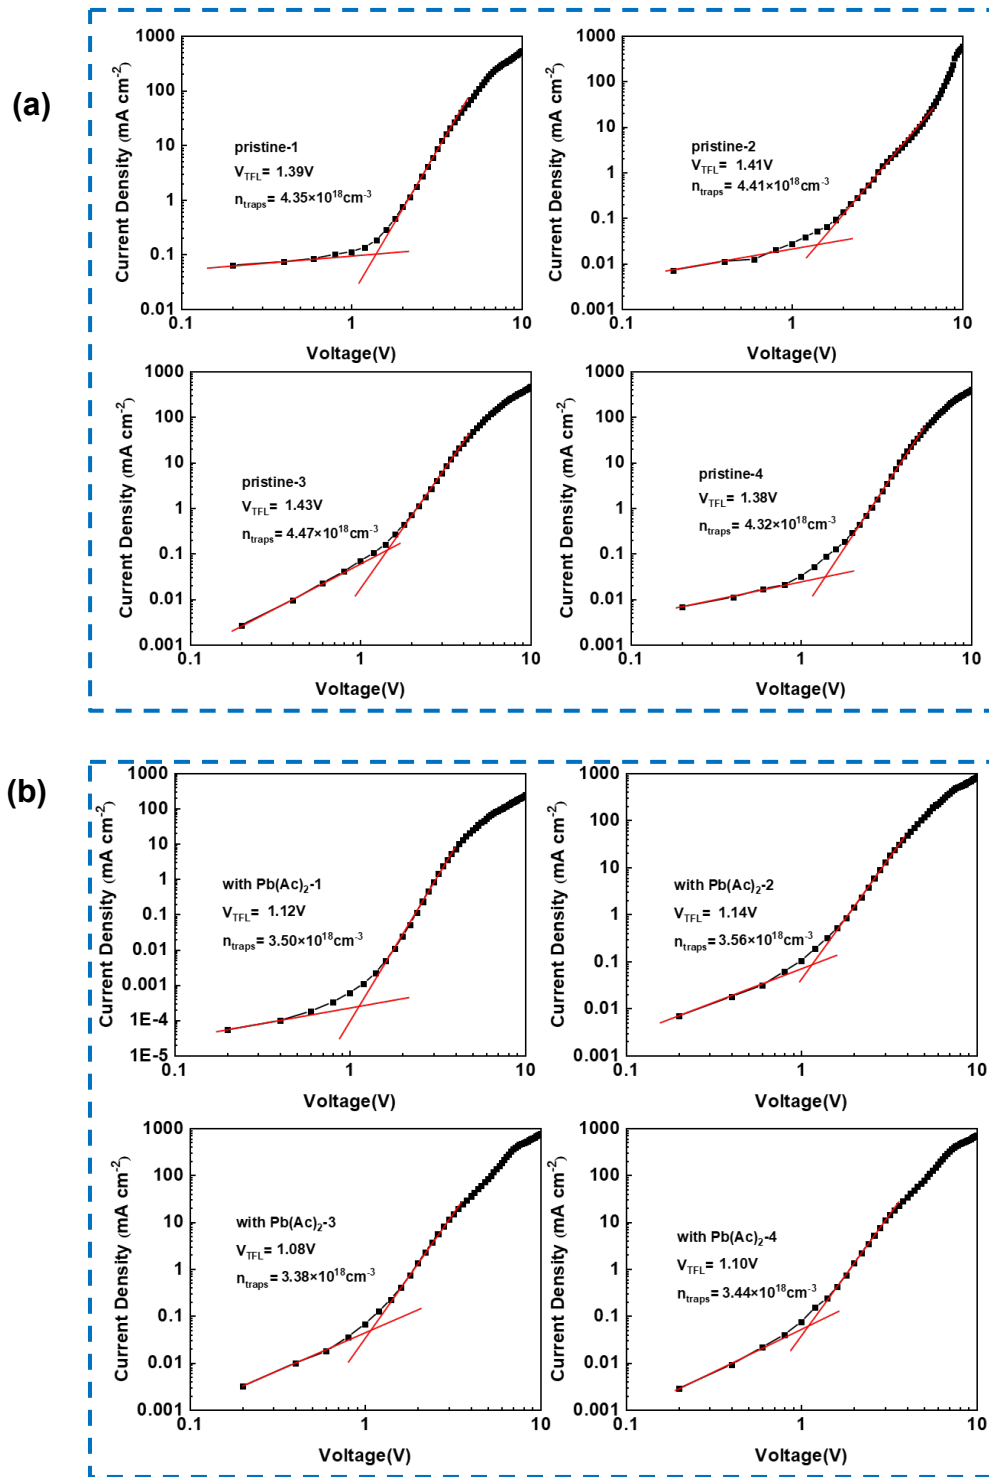

Figure S1. The J-V curves of hole-only devices: (a) control device, (b) with  $\text{Pb(Ac)}_2$ .

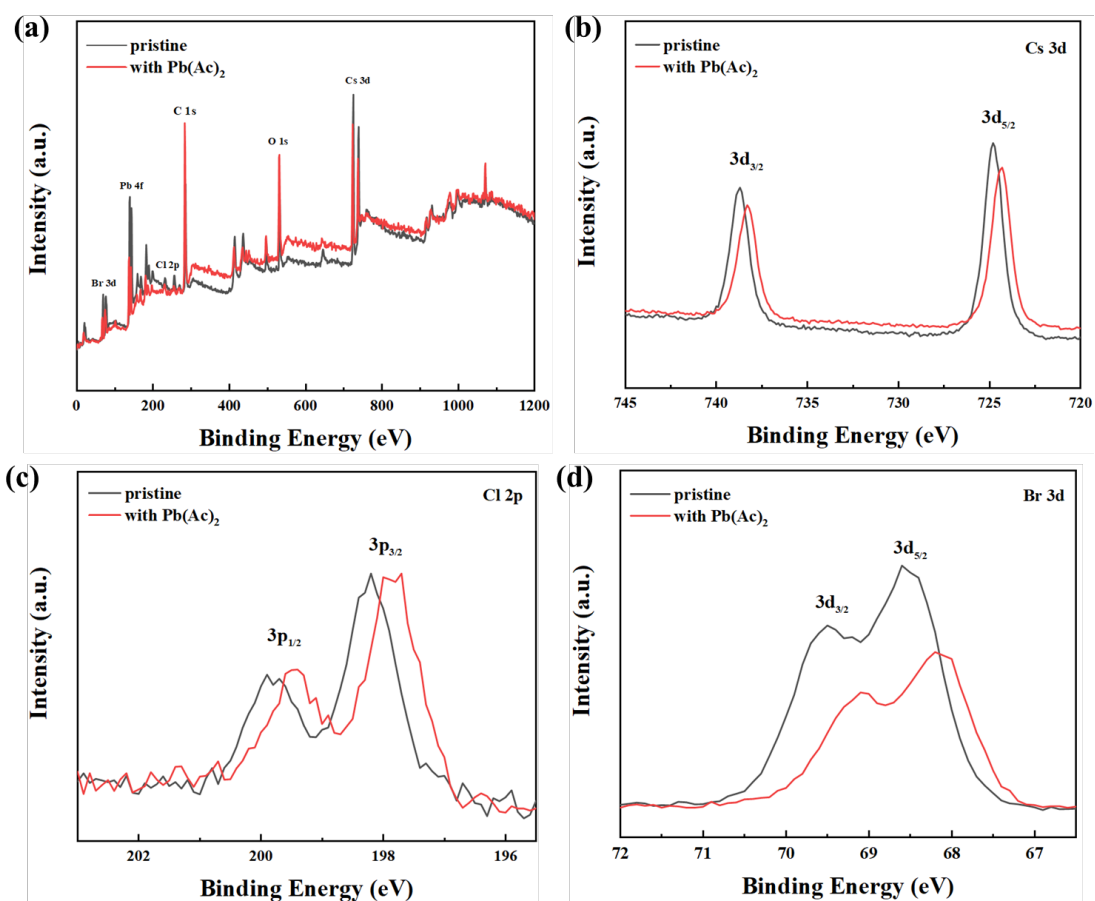

Figure S2. XPS spectra of perovskite films: (a) full spectra, (b) Cs 3d, (c) Cl 2p and (d) Br 3d.

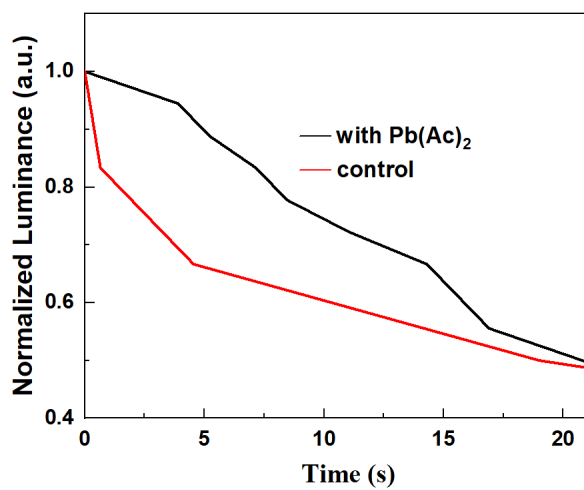

Figure S3. The operational stability of control device and device with  $\text{Pb}(\text{Ac})_2$ .

Table S1. The statistical defect density values estimated from SCLC data.

|                               | Data 1<br>( $\times 10^{18} \text{ cm}^{-3}$ ) | Data 2<br>( $\times 10^{18} \text{ cm}^{-3}$ ) | Data 3<br>( $\times 10^{18} \text{ cm}^{-3}$ ) | Data 4<br>( $\times 10^{18} \text{ cm}^{-3}$ ) | Average<br>( $\times 10^{18} \text{ cm}^{-3}$ ) |
|-------------------------------|------------------------------------------------|------------------------------------------------|------------------------------------------------|------------------------------------------------|-------------------------------------------------|
| control                       | 4.35                                           | 4.41                                           | 4.47                                           | 4.32                                           | 4.39                                            |
| with $\text{Pb}(\text{Ac})_2$ | 3.5                                            | 3.56                                           | 3.38                                           | 3.44                                           | 3.47                                            |

Table S2. Summary of the elemental content of Cs, Pb, Br and Cl in the pristine perovskite film by using semi-quantitative elemental analysis with XPS.

| element | FWHM (eV) | area (CPS-eV) | elemental content<br>(at.%) |
|---------|-----------|---------------|-----------------------------|
| Cs3d    | 2.71      | 203109.8      | 21.93                       |
| Pb4f    | 1.64      | 265839        | 16.32                       |
| Br3d    | 2.79      | 55152.07      | 40                          |
| Cl2p    | 4.14      | 27939.94      | 21.74                       |
